# Supplementary material for: Hydrogen sulfide-releasing polyurethane/gelatin/keratin–TA conjugate mats for wound healing
Source: Royal Society of Chemistry journal article supplement (doi:10.1039/d2tb01700h), 2022-01-01
Supplement: d2tb01700h1.pdf [file d2tb01700h1.pdf]

## Supplementary Information

Hydrogen sulfide-releasing polyurethane/gelatin/keratin-TA conjugate mats for wound healing

Xiao Han<sup>1</sup>, Lijuan Wang<sup>1</sup>, Yushang Shang<sup>1</sup>, Xu Liu<sup>1</sup>, Jiang Yuan<sup>1,\*</sup>, Jian Shen<sup>1,2,\*</sup>

<sup>1</sup>National and Local Joint Engineering Research Center of Biomedical Functional Materials, School of Chemistry and Materials Science, Nanjing Normal University, Nanjing 210023, P. R. China

<sup>2</sup>Jiangsu Engineering Research Center of Interfacial Chemistry, Nanjing University, Nanjing 210093, P. R. China

\* Corresponding authors.

E-mail addresses: bioalchem@yahoo.com (J. Yuan), jshen@njnu.edu.cn (J. Shen)

## 1 UV-Vis spectra

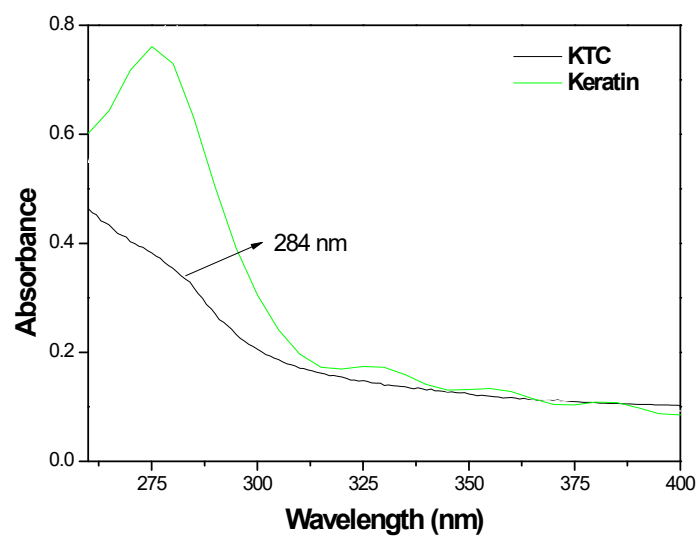

Fig.S1 UV-Vis spectra of keratin and KTC

## 2 H-NMR

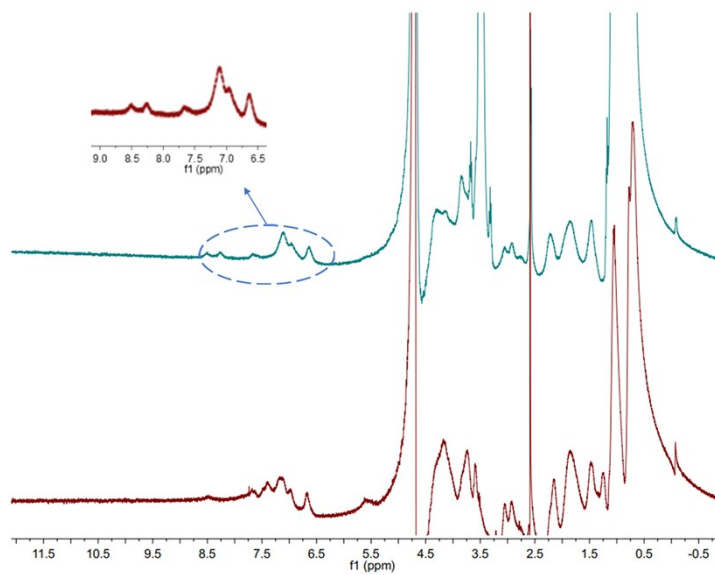

Fig.S2 H-NMR of keratin(lower) and KTC(upper)

### 3 Diameter of nanofibers

Table S1 The diameter and distribution of nanofibers

|            | Mean (nm) | SD (nm) |
|------------|-----------|---------|
| PU         | 676.6     | 273.9   |
| PU/Gel     | 380.7     | 136.9   |
| PU/Gel/KTC | 334.2     | 108.3   |

### 4 XPS

Table S2 Surface element composition of nanofibers by XPS

| Samples    | Element (atom%) |                 |                 |                 |
|------------|-----------------|-----------------|-----------------|-----------------|
|            | C <sub>1s</sub> | O <sub>1s</sub> | N <sub>1s</sub> | S <sub>2p</sub> |
| PU         | 70.9            | 22.8            | 3.2             | 0               |
| PU/Gel     | 72.1            | 19.8            | 7.2             | 0               |
| PU/Gel/KTC | 68.9            | 20.0            | 10.3            | <b>0.7</b>      |

### 5 Histological analysis

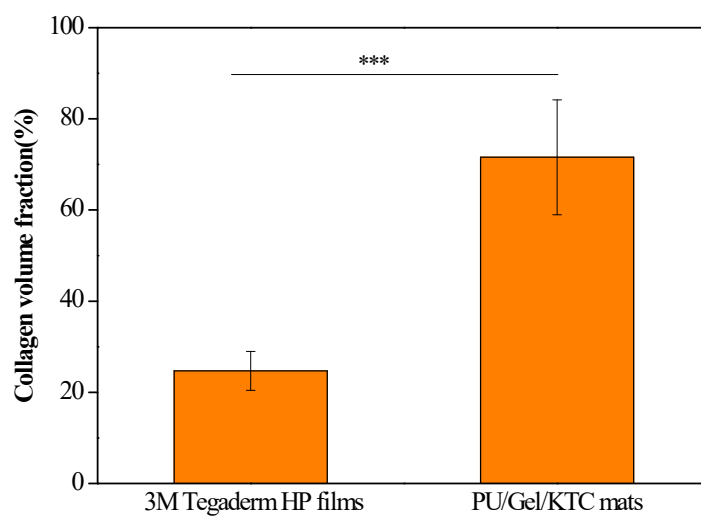

Fig.S3 Collagen volume fraction of wounds treated with 3M Tegaderm HP films and PU/Gel/KTC

mats for 15 days.

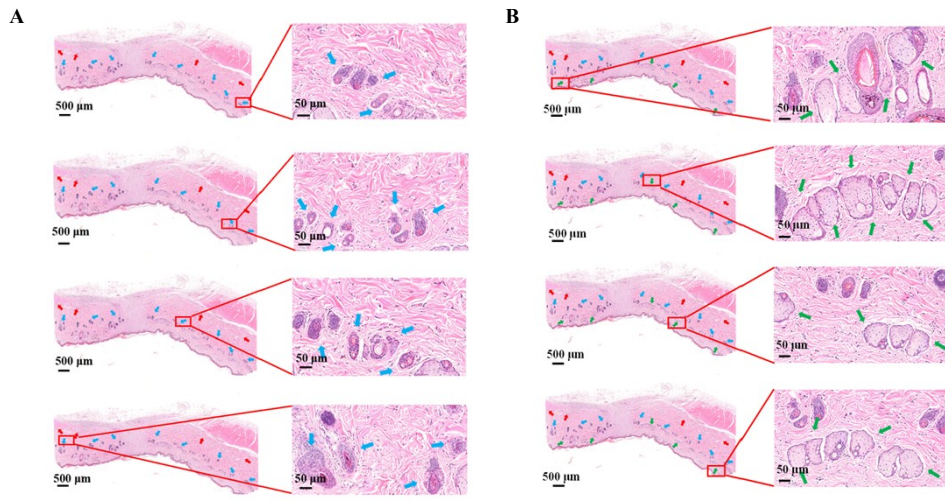

Fig.S4 The newborn hair follicles (A) and the newborn sebaceous glands (B) in the ulcer bed as treated with PU/Gel/KTC mats for 15 days (blue arrows and green arrows indicated hair follicles and sebaceous glands, respectively).
